# Supplementary material
Source: Frontiers journal article supplement (https://www.frontiersin.org/articles/449601)

**Supplementary figure S1.** Neuronal responsive firing rate for white noise (blue),  $1/f$  (red) and  $1/f^2$  noise (black) with various intensities (82.37, 164.80, 247.23, 329.67, 412.10 and 494.53 pA) and a noisy cutoff frequency of 50 Hz (A), 100 Hz (B), 200 Hz (C) and 500 Hz (D).  $F_{\text{cut}}$ , cutoff frequency.

**Supplementary figure S2.** Plots of reliability vs  $\beta$  for the three types of  $1/f^\beta$  input noises with a cutoff frequency of 50 Hz (A), 200 Hz (B), and 1000 Hz (C).  $F_{\text{cut}}$ , cutoff frequency.

**Supplementary figure S3. Effects of  $\alpha_m$ ,  $\beta_m$  and  $\beta_h$  on the responsive firing rate of model neurons.** (A1-C1) Plots of firing rate vs intensity for white noise (blue),  $1/f$  (red) and  $1/f^2$  noise (black) for a normal neuron (dotted line) compared with the results from the model neuron in the case of 2  $\alpha_m$  (solid line, A1), 2  $\beta_m$  (solid line, B1), 5  $\beta_h$  (solid line, C1).  $F_{\text{cut}} = 1000$  Hz. (A2-C2) Plots of firing rate vs cutoff frequency for white noise (blue),  $1/f$  (red) and  $1/f^2$  noise (black) for a normal neuron (dotted line) compared with the results from the model neuron in the case of 2  $\alpha_m$  (solid line, A2), 2  $\beta_m$  (solid line, B2), 5  $\beta_h$  (solid line, C2). Noise  $\sigma = 9 \mu\text{A}/\text{cm}^2$ . (A3-C3) Plots of firing rate vs times of  $\alpha_m$  (solid line, A3),  $\beta_m$  (solid line, B3) and  $\beta_h$  (solid line, C3) for white noise (blue),  $1/f$  (red) and  $1/f^2$  noise (black) for a normal neuron (dotted line) compared with the results from the model neuron.  $F_{\text{cut}} = 1000$  Hz. Noise  $\sigma = 9 \mu\text{A}/\text{cm}^2$ .

**A**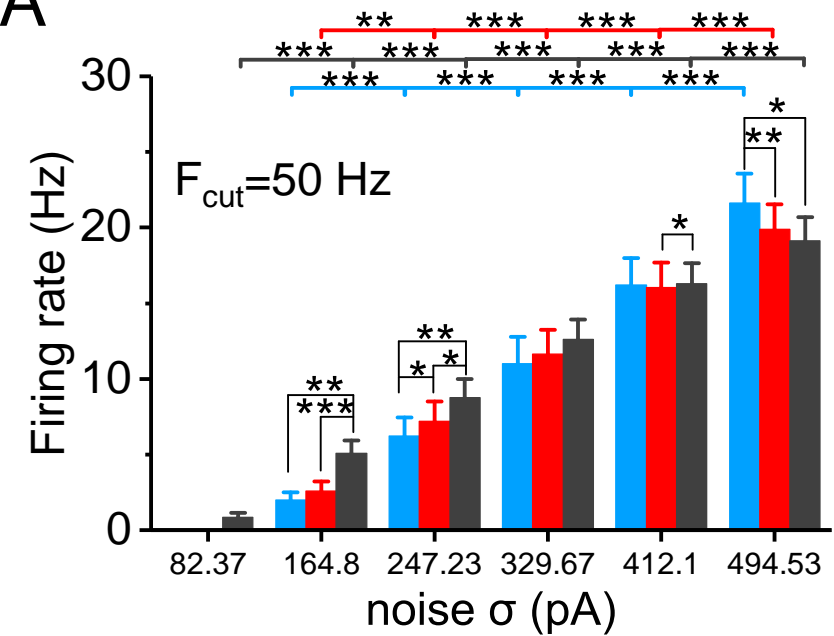**B**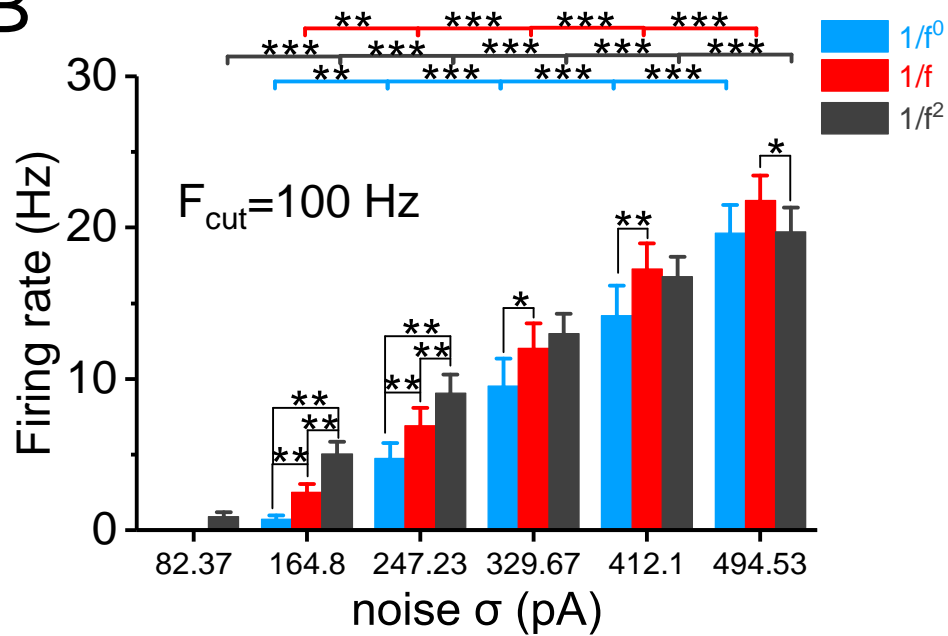**C**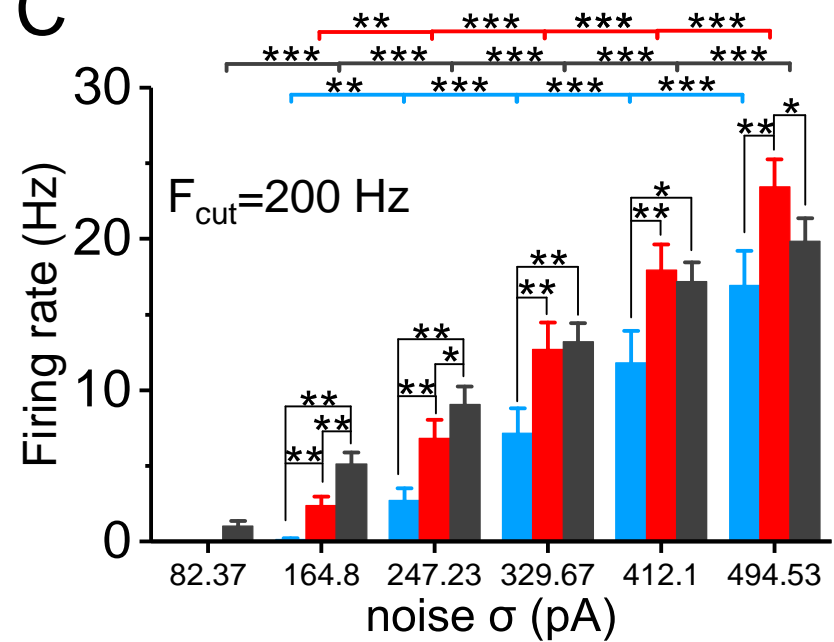**D**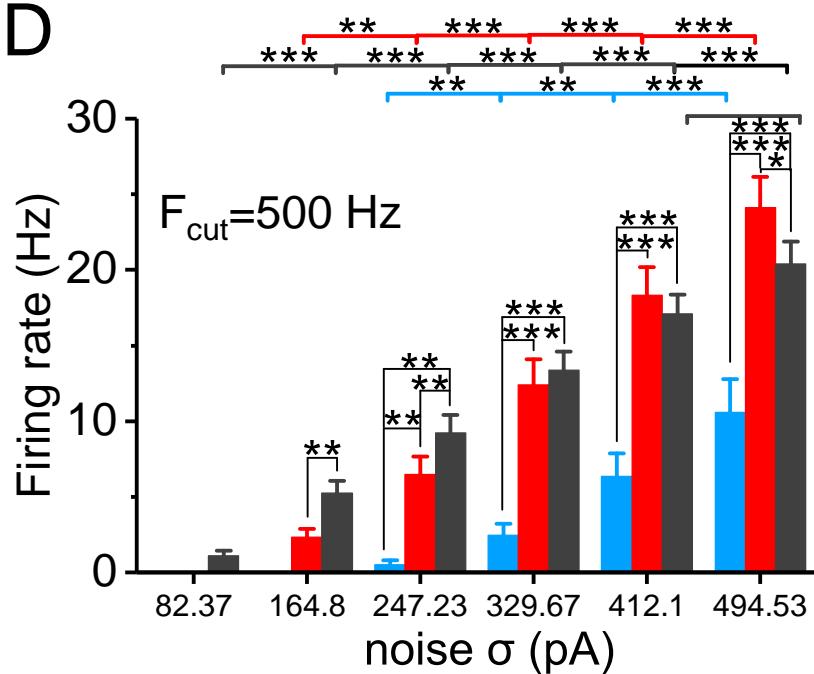

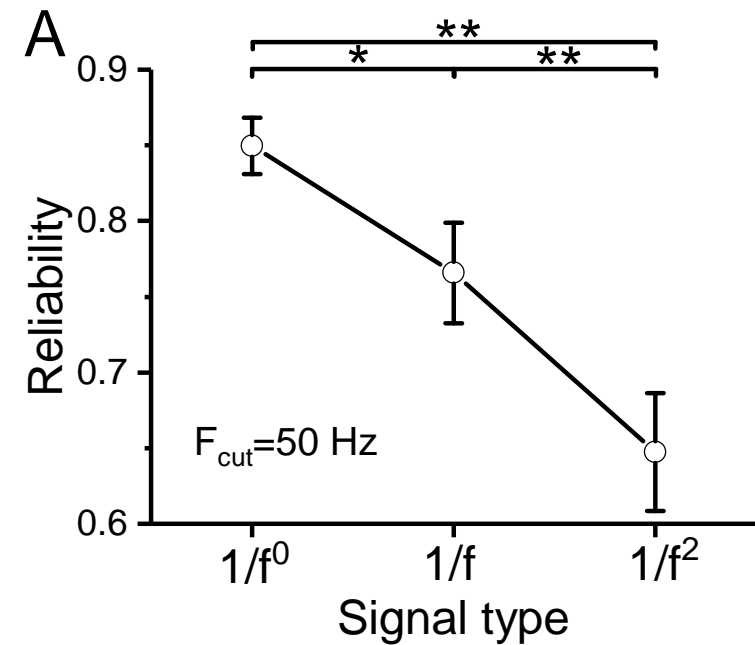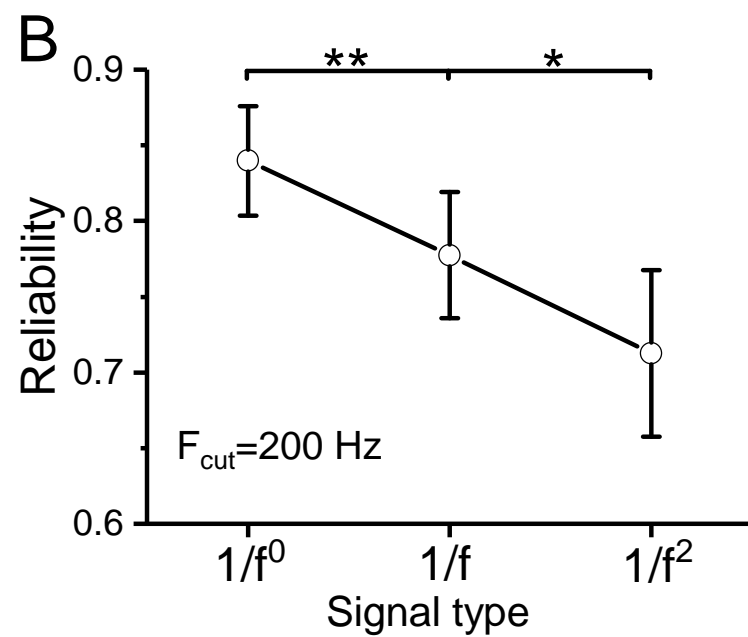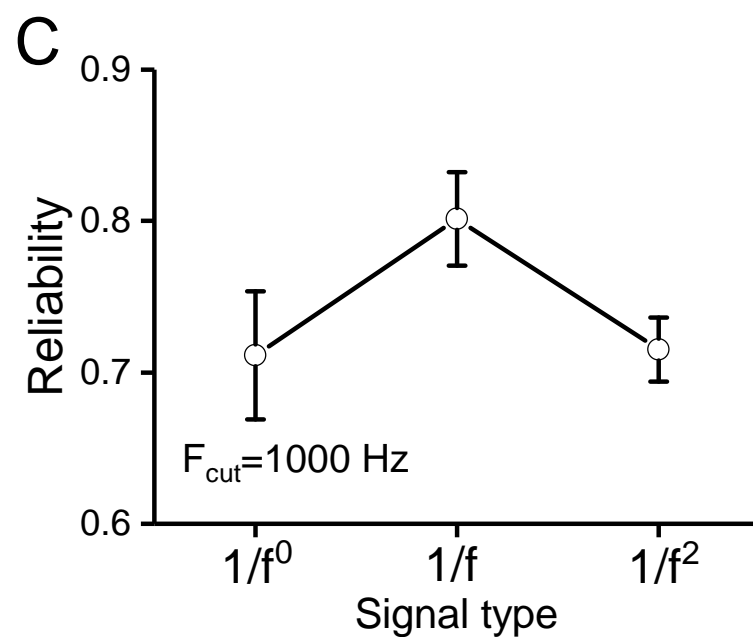

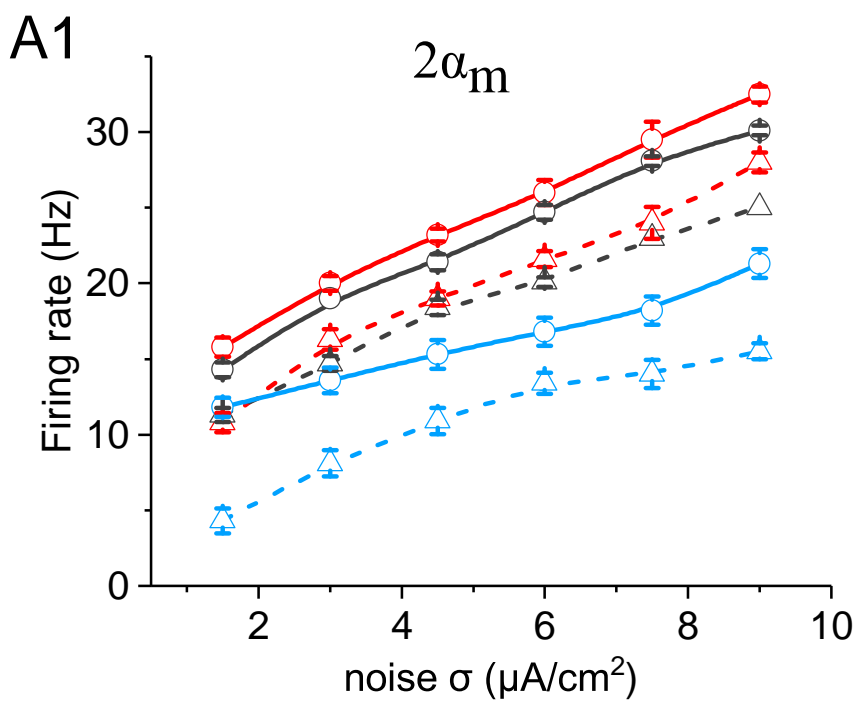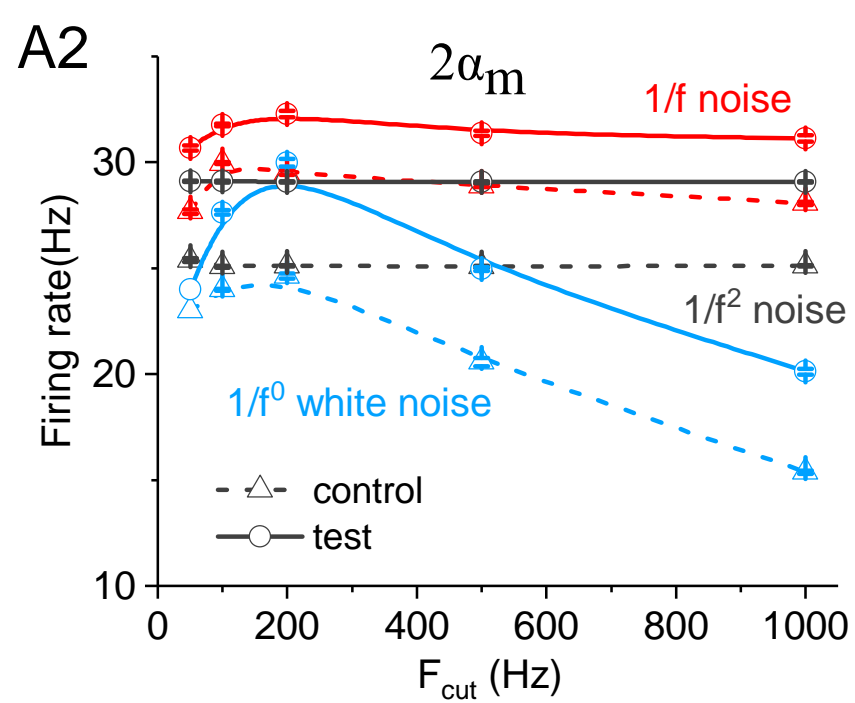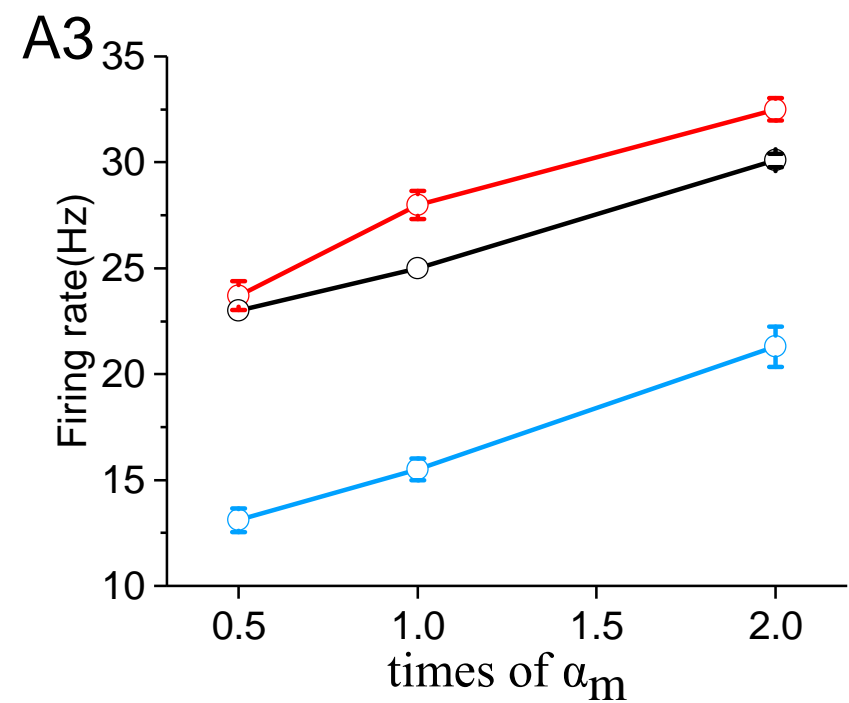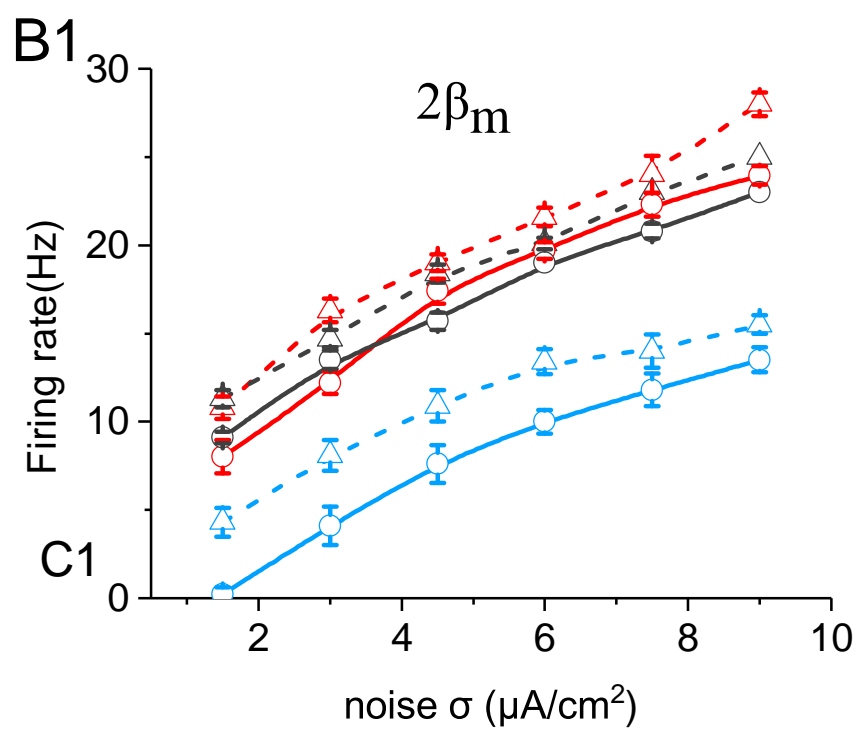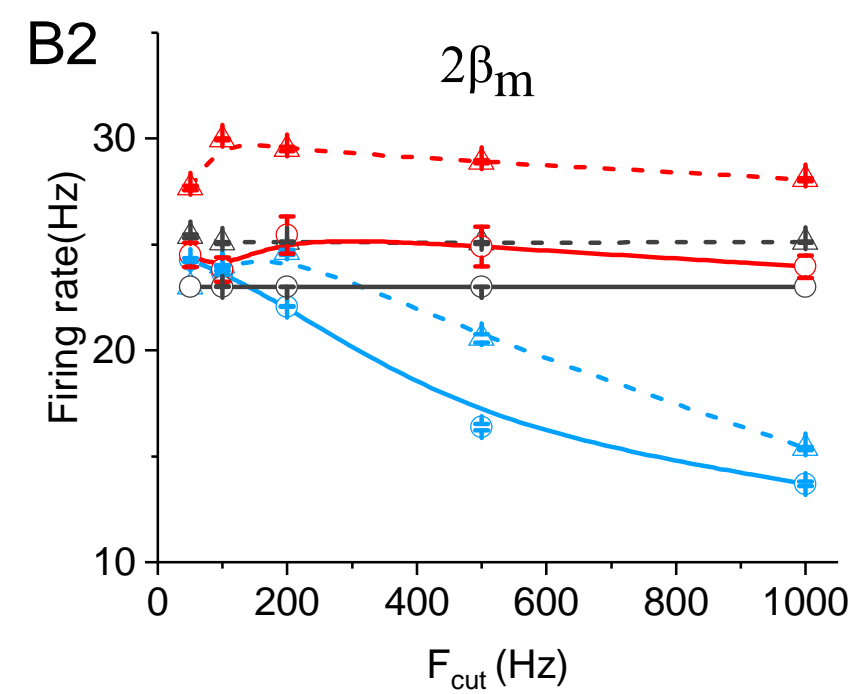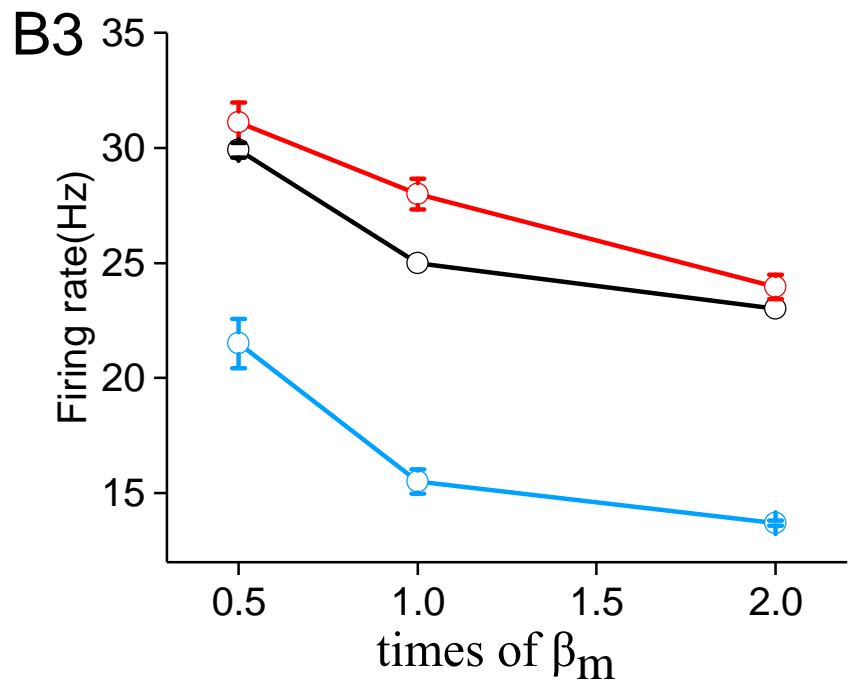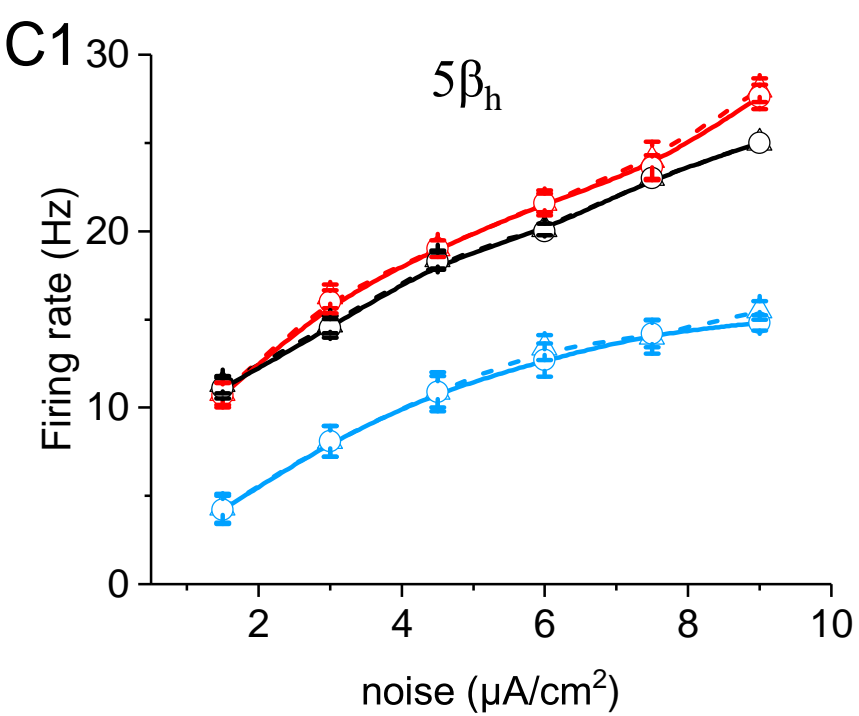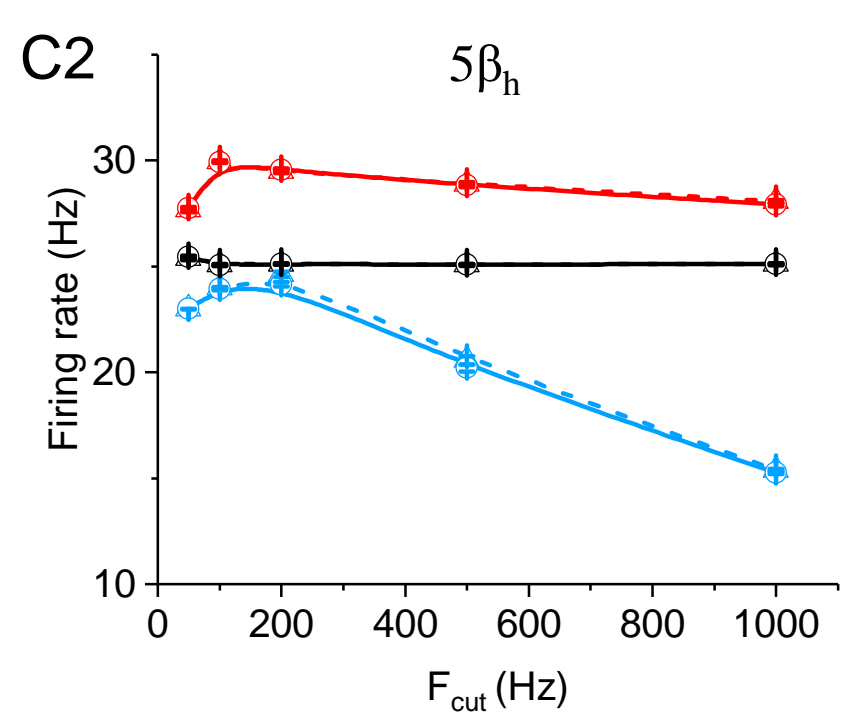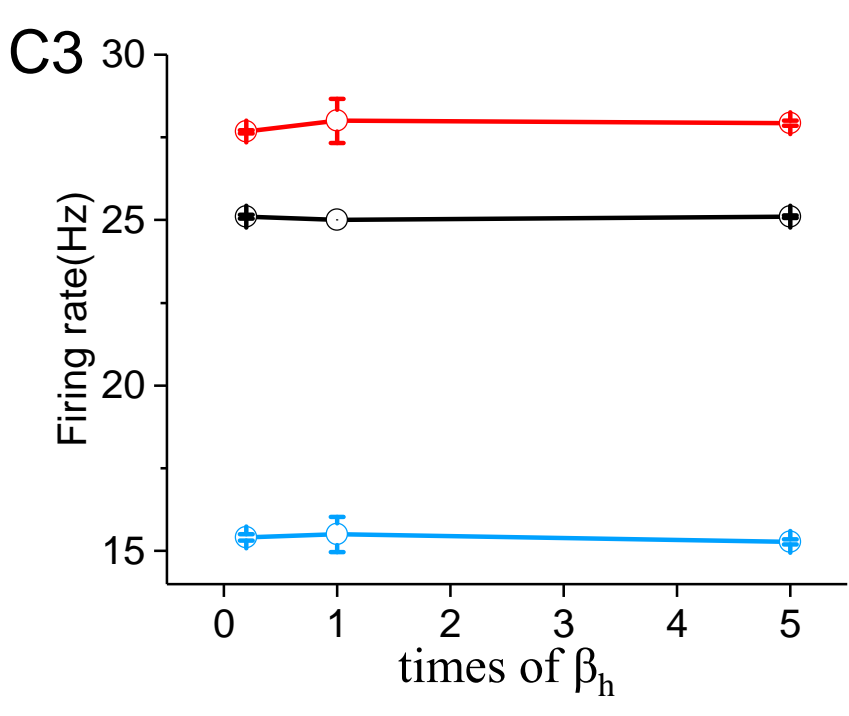

Supplement: Data_Sheet_1.PDF [file Data_Sheet_1.PDF]
